# Supplementary material for: Effectiveness of conservative non-pharmacological interventions in people with muscular dystrophies: a systematic review and meta-analysis
Source: PubMed Central journal article supplement — J Neurol Neurosurg Psychiatry. 2023 Dec 12;95(5):442–53. doi: 10.1136/jnnp-2023-331988 (PMC11041561; doi:10.1136/jnnp-2023-331988), 2023-12-12
Supplement: jnnp-2023-331988supp002.pdf [file jnnp-2023-331988supp002.pdf]

**Supplementary file 2. Framework for data extraction process**

|                                                                                                                                                                                                                                                         |
|---------------------------------------------------------------------------------------------------------------------------------------------------------------------------------------------------------------------------------------------------------|
| Data extraction framework                                                                                                                                                                                                                               |
| Authors                                                                                                                                                                                                                                                 |
| Year of publication                                                                                                                                                                                                                                     |
| Country of publication                                                                                                                                                                                                                                  |
| Study design                                                                                                                                                                                                                                            |
| Sample size                                                                                                                                                                                                                                             |
| Participant demographics                                                                                                                                                                                                                                |
| Study setting                                                                                                                                                                                                                                           |
| Conservative non-pharmacological Intervention characteristics (FITT principles) <ul style="list-style-type: none"> <li>• Intervention frequency</li> <li>• Target intensity</li> <li>• Intervention duration</li> <li>• Type of intervention</li> </ul> |
| Outcome measures pertaining the following domains (based on the ICF framework) <ul style="list-style-type: none"> <li>• Body function*</li> <li>• Body structure**</li> <li>• Activities and participation***</li> <li>• Pain</li> </ul>                |
| Presence of supervision                                                                                                                                                                                                                                 |
| Adherence                                                                                                                                                                                                                                               |
| Attrition rate                                                                                                                                                                                                                                          |
| Adverse events                                                                                                                                                                                                                                          |

Abbreviations: FITT, Frequency, Intensity, Time, and Type; ICF, International Classification of Functioning, Disability and Health

**Notes:**

\*Comprised objective outcome measures assessing the body physiological functions. Outcome measures pertaining molecular biomarkers and histological as well as muscle biopsy parameters were not extracted for the purpose of this study

\*\*Comprised objective outcome measures assessing the anatomical parts of the body

\*\*\*Comprised objective and patient-reported outcomes measuring patients' difficulties in executing tasks and activities

Classification: Restricted
