# Supplementary material for: Effectiveness of conservative non-pharmacological interventions in people with muscular dystrophies: a systematic review and meta-analysis
Source: PubMed Central journal article supplement — J Neurol Neurosurg Psychiatry. 2023 Dec 12;95(5):442–53. doi: 10.1136/jnnp-2023-331988 (PMC11041561; doi:10.1136/jnnp-2023-331988), 2023-12-12
Supplement: jnnp-2023-331988supp004.pdf [file jnnp-2023-331988supp004.pdf]

## Supplementary file 4. Number of participants in each intervention type

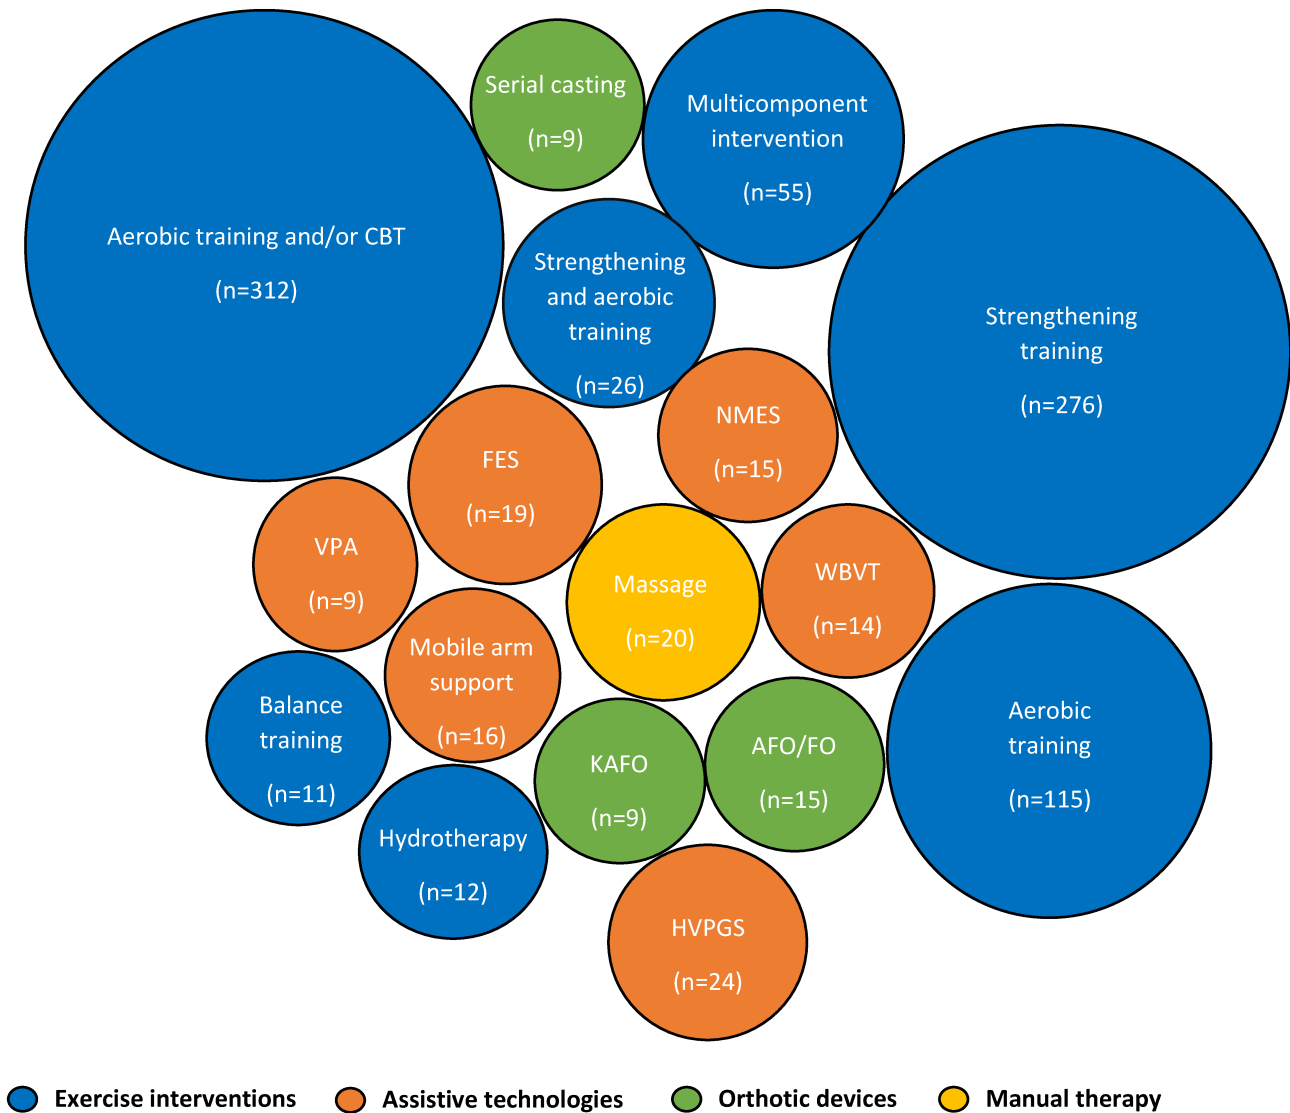

Abbreviations: CBT, Cognitive Behavioural Therapy; VPA, Vibratory Proprioceptive Assistance; FES, Functional Electrical Stimulation; NMES, Neuromuscular Electrical Stimulation; WBVT, Whole-Body Vibration Training; HVPGS, High Voltage Pulsed Galvanic Stimulation; KAFO, Knee-Ankle-Foot Orthosis; AFO, Ankle Foot Orthosis; FO, Foot orthosis.

Classification: Restricted
