# Supplementary material for: Effectiveness of conservative non-pharmacological interventions in people with muscular dystrophies: a systematic review and meta-analysis
Source: PubMed Central journal article supplement — J Neurol Neurosurg Psychiatry. 2023 Dec 12;95(5):442–53. doi: 10.1136/jnnp-2023-331988 (PMC11041561; doi:10.1136/jnnp-2023-331988), 2023-12-12
Supplement: jnnp-2023-331988supp005.pdf [file jnnp-2023-331988supp005.pdf]

## Supplementary file 5. Characteristics of the included studies

| Orthotic devices                  |      |             |                              |                      |                                                                                                                                                                                                                                    |
|-----------------------------------|------|-------------|------------------------------|----------------------|------------------------------------------------------------------------------------------------------------------------------------------------------------------------------------------------------------------------------------|
| Authors                           | Year | Country     | Study design                 | MD type(s)           | Participant characteristics                                                                                                                                                                                                        |
| Glanzman et al. <sup>42</sup>     | 2011 | USA         | Case series                  | DMD                  | n=9 (M), mean age: 8.9 ±2.1 years; IC: ability to rise from the floor independently, lacking ROM to neutral dorsiflexion and/or habitual toe walkers                                                                               |
| Aprile et al. <sup>43</sup>       | 2013 | Italy       | Before-after study (no CG)   | FSHD                 | n=15 (F: n=11; M, n=4), mean age 47.3±16.7 years; IC: CSS grade 2.5-4 grade                                                                                                                                                        |
| Taktak et al. <sup>44</sup>       | 1995 | UK          | Before-after study (no CG)   | DMD                  | n=9 (M), age range: 5-13 years                                                                                                                                                                                                     |
| Manual therapy                    |      |             |                              |                      |                                                                                                                                                                                                                                    |
| Carroll et al. <sup>38</sup>      | 2020 | Australia   | Crossover study              | DMD                  | n=20 (M), mean age: 9.3 years (range: 8.0–10.5 years); IC: ability to walk independently (> 10 m) and to lay prone (> 10 min)                                                                                                      |
| Assistive technologies            |      |             |                              |                      |                                                                                                                                                                                                                                    |
| Heutinck et al. <sup>30</sup>     | 2018 | Netherlands | RCT                          | DMD                  | n=16 (M); SG, n=7, mean age: 12.9±2.8 years; CG, n=9, mean age: 12.6±3.4 years; IC: inability to walk and impaired arm function (grade 2-4 Brooke Upper Extremity Scale)                                                           |
| Vry et al. <sup>45</sup>          | 2014 | Germany     | Before-after study (no CG)   | DMD                  | n=14 (M), mean age: 8.8 years; IC: ability to walk unaided (≥ 10 m)                                                                                                                                                                |
| Pegoraro et al. <sup>47</sup>     | 2020 | Italy       | Before-after study (no CG)   | DM1                  | n=9 (F: n=1; M, n=8), mean age: 47 years (range: 38-67 years); IC: MIRS grade 2+ and tibialis anterior muscle strength <4 MRC scale                                                                                                |
| Zupan et al. <sup>16</sup>        | 1995 | Slovenia    | Before-after trial (with CG) | DMD, BMD, LGMD, FSHD | n=10 (DMD, n=2; BMD, n=3; LGBMD, n=3; FSHD, n=1), mean age: 14.3±4.3 years                                                                                                                                                         |
| Chisari et al. <sup>46</sup>      | 2013 | Italy       | Before-after study (no CG)   | DM1, CMD             | n=6; DM1: n=5 (F: n=2; M: n=3), age range: 28-65 years; CMD: n=1, gender not specified, age: 39                                                                                                                                    |
| Colson et al. <sup>44</sup>       | 2010 | France      | Before-after study (no CG)   | FSHD                 | n=9 (F: n=3; M, n=6), mean age: 55.21 years; IC: quadriceps femoris muscle weakness and ability to walk unaided (Vignos scale ≤5)                                                                                                  |
| Kilinç et al. <sup>22</sup>       | 2015 | Turkey      | Before-after trial (with CG) | LGMD                 | n=24 (F, n=5; M, n=19); Electrical stimulation group, n=11; mean age: 31.62±16.92 years; Exercise group, n=13; mean age: 30.14±11.04 years; IC: ability to walk without assistive devices and muscle strength grade 3+ (MRC scale) |
| Ribot-Ciscar et al. <sup>41</sup> | 2015 | France      | Before-after study (no CG)   | FSHD                 | n=9 (F, n=6; M, n=3), mean age: 58±11 years; IC: preserved shoulder abduction and Brooke Upper Extremity Scale grade 2-4                                                                                                           |

| Exercise interventions                                       |      |                                     |                              |                            |                                                                                                                                                                                                                                                                                                                                         |
|--------------------------------------------------------------|------|-------------------------------------|------------------------------|----------------------------|-----------------------------------------------------------------------------------------------------------------------------------------------------------------------------------------------------------------------------------------------------------------------------------------------------------------------------------------|
| Authors                                                      | Year | Country                             | Study design                 | MD type(s)                 | Participant characteristics                                                                                                                                                                                                                                                                                                             |
| <b>Aerobic training</b>                                      |      |                                     |                              |                            |                                                                                                                                                                                                                                                                                                                                         |
| Bulut et al. <sup>38</sup>                                   | 2022 | Turkey                              | RCT                          | DMD                        | n=21; SG: n=10, median age: 7.9 years (7.2, 8.7), CG: n=11, median age: 8.6 years (7.9, 10.1); IC: grade 1-2 Vignos Scale                                                                                                                                                                                                               |
| Sherief et al. <sup>32</sup>                                 | 2021 | Egypt                               | RCT                          | DMD                        | n=30 (M); Group A, n=15; mean age: 8.34 ± 0.88 years; Group B, n=15; mean age: 8.49 ± 0.83 years; IC: grade 3+ MRC scale (lower limbs and trunk); sufficient functional upper and lower limb ROMs; and level I and II AFCS                                                                                                              |
| Bankolé et al. <sup>33</sup>                                 | 2016 | France                              | RCT                          | FSHD                       | n=19; SG: n=10 (F, n=4; M, n=6); CG: n=9 (F, n=1; M, n=8). 16 participants completed the study. 8 in CG (F, n=1; M, n=7, mean age: 41±9 years), 8 in SG (F, n=3; M, n=5, mean age: 40±13 years)                                                                                                                                         |
| Mikhall et al. <sup>55</sup>                                 | 2022 | Canada                              | Before-after study (no CG)   | DM1                        | n=22; SG, n=11 (F, n=6; M, n=5), mean age: 42.6±3 years; CG, n=11 (F, n=6; M, n=5), mean age: 42.5±2 years                                                                                                                                                                                                                              |
| Svein et al. <sup>54</sup>                                   | 2008 | Denmark                             | Before-after study (no CG)   | BMD                        | n=11 (M), mean age: 32 ± 4 years                                                                                                                                                                                                                                                                                                        |
| Orngreen et al. <sup>53</sup>                                | 2005 | Denmark                             | Before-after study (no CG)   | DM1                        | n=12 (F, n=3; M, n=9); age range: 21-58 years                                                                                                                                                                                                                                                                                           |
| <b>Aerobic training and/or cognitive behavioural therapy</b> |      |                                     |                              |                            |                                                                                                                                                                                                                                                                                                                                         |
| Okkersen et al. <sup>23</sup>                                | 2018 | France, Germany, UK and Netherlands | RCT                          | DM1                        | n=255; SG: n=128 (F, n=58; M, n=70, mean age: 44.8±11.7 years; CG, n=127 (F, n=60; M, n=67), mean age: 46.4±11.3 years. IC: ability to walk independently (walking aids permitted)                                                                                                                                                      |
| Voet et al. <sup>24</sup>                                    | 2014 | Netherlands                         | RCT                          | FSHD                       | n=57; CBT: n=13 (F, n=5; M, n=8) median age: 49 years (range: 24-69 years); ATG: n=20 (F, n=8; M, n=12) median age: 59 years (range: 21-68 years); CG, n=24 (F, n=17; M, n=17), median age: 52 years (range: 20-79 years). IC: ability to walk independently (orthoses and walking aids permitted)                                      |
| <b>Strength and aerobic training</b>                         |      |                                     |                              |                            |                                                                                                                                                                                                                                                                                                                                         |
| Kontou et al. <sup>52</sup>                                  | 2020 | Greece                              | Before-after study (no CG)   | DM2                        | n=10 (F, n=3; M, n=7), mean age: 63.0 ± 8.3 years; IC: ability to walk                                                                                                                                                                                                                                                                  |
| Jensen et al. <sup>51</sup>                                  | 2016 | Denmark                             | Before-after study (no CG)   | BMD, LGMD type 2I          | n=8; BMD: n=5 (M); LGMD2I: n=3 (F, n=2; M, n=1); mean age: 36 ± 4 years; IC: ability to stand/walk, but inability to exercise unsupervised (e.g., running, cycling)                                                                                                                                                                     |
| Berthelsen et al. <sup>50</sup>                              | 2014 | Denmark                             | Before-after study (no CG)   | BMD, LGMD type 2I          | n=8; BMD: n=5 (M); LGMD2I: n=3 (F, n=2; M, n=1); mean age: 36 ± 4 years; IC: ability to stand/walk, but inability to exercise unsupervised (e.g., running, cycling)                                                                                                                                                                     |
| <b>Strength training</b>                                     |      |                                     |                              |                            |                                                                                                                                                                                                                                                                                                                                         |
| Güneş Gencer et al. <sup>34</sup>                            | 2022 | Turkey                              | RCT                          | DMD                        | n=26 (M); SG: n=13, mean age: 11.6 ± 2.6 years; CG: n=13, mean age: 10.6±3.4 years                                                                                                                                                                                                                                                      |
| Kenis-Coskun et al. <sup>35</sup>                            | 2022 | Turkey                              | RCT                          | DMD                        | n=22 (M); SG: n=10, mean age: 8.80 ± 2.93 years; CG: n=12, mean age: 7.00±2.00 years; IC: ability to walk                                                                                                                                                                                                                               |
| Maghbouli et al. <sup>28</sup>                               | 2021 | Iran                                | RCT                          | MD (subtype not specified) | n=40; SG, n=20 (F, n=6; M, n=14), mean age: 37.3±1.8 years; CG, n=20 (F, n=5; M, n=15), mean age: 31.2±5.5 years. IC: ability to walk (≥ 10 m) (walking aids permitted)                                                                                                                                                                 |
| Alemdaroglu et al. <sup>36</sup>                             | 2015 | Turkey                              | RCT                          | DMD                        | n=24 (M), age range: 8–12 years; SG; n=12, mean age: 9.50±1.38 years; CG: n=12, mean age: 9.33±1.37 years. IC: grade 1-3 Brooke Upper Extremity scale                                                                                                                                                                                   |
| Aldehag et al. <sup>39</sup>                                 | 2013 | Sweden                              | RCT (with cross-over design) | DM1                        | n=35 (F, n=21; M, n=14); mean age: 46 years, range: 26-69 years; Group A: n=18 (F: n=5; M, n=13); Group B: n=17 (F, n=8; M, n=9). IC: MRC scale grade 3+ (wrist and hand muscles)                                                                                                                                                       |
| Jansen et al. <sup>29</sup>                                  | 2013 | Netherlands                         | RCT                          | DMD                        | n=30 (M), mean age: 10.5±2.6 years; SG: n=17, mean age: 10.8±2.4 years; CG: n=13, mean age: 10.5±2.8 years. IC: ambulant individuals with impaired gait and/or difficulties with rising from the floor; wheelchair-dependent individuals able to touch the top of their head with both hands, or able to use a hand-operated wheelchair |
| Lindeman et al. <sup>37</sup>                                | 1995 | Netherlands                         | RCT                          | MD (subtype not specified) | n=30; SG: n=15 (F, n=6; M, n=9), mean age: 40±11 years (range:18-57 years); CG: n=15 (F, n=3; M, n=12), mean age: 37±10 years (range: 20-55 years)                                                                                                                                                                                      |
| O'Dowd et al. <sup>40</sup>                                  | 2022 | UK                                  | Before-after study (no CG)   | FSHD, LGMD, BMD            | n=17 (F, n=13; M, n=7), mean age: 44±11 years; FSHD: n=6 (F, n=2; M, n=4), mean age: 43±12 years; LGMD: n=6 (F: n=2; M: n=4), mean age: 47±11; BMD: n=5, mean age: 40±8 years; IC: ability to walk (≥ 7 m) (walking aids permitted)                                                                                                     |
| Lessard et al. <sup>27</sup>                                 | 2021 | Canada                              | Before-after study (no CG)   | DM1                        | n=15 (M), mean age: 47.7±10.9 years (range: 28-62 years)                                                                                                                                                                                                                                                                                |
| Roussel et al. <sup>26</sup>                                 | 2020 | Canada                              | Before-after study (no CG)   | DM1                        | n=11 (M), age range: 30-65 years. IC: ability to walk without assistance                                                                                                                                                                                                                                                                |

|                                    |      |        |                              |                            |                                                                                                                                                                                                                          |
|------------------------------------|------|--------|------------------------------|----------------------------|--------------------------------------------------------------------------------------------------------------------------------------------------------------------------------------------------------------------------|
| Bostock et al. <sup>25</sup>       | 2019 | UK     | Before-after study (no CG)   | LGMD, BMD, FSHD            | n=17 (F, n=4; M, n=13), mean age: 44±11 years; LGMD, n=6; BMD, n=5; FSHD, n=6. IC: ability to walk (≥ 7 m) (walking aids permitted)                                                                                      |
| Tollbäck et al. <sup>49</sup>      | 1999 | Sweden | Before-after trial (with CG) | MD (subtype not specified) | n=9 (F, n=7; M, n=2), mean age: 37±8.6 years; IC: ability to walk and to fully extend the knee against a 3 kg load                                                                                                       |
| <b>Hydrotherapy</b>                |      |        |                              |                            |                                                                                                                                                                                                                          |
| Hind et al. <sup>17</sup>          | 2017 | UK     | RCT                          | DMD                        | n=12; median age: 8.0 years (7.5, 9.5); SG: n=8, mean age: 8.0±0.9 years; CG: n=4; mean age: 9.8±2.5 years. IC: ability to walk (≥ 10 m) without aids/assistance and NSAA score of 8–34                                  |
| <b>Balance training</b>            |      |        |                              |                            |                                                                                                                                                                                                                          |
| Hammarén et al. <sup>48</sup>      | 2015 | Sweden | Before-after study (no CG)   | DM1                        | n=11 (F, n=3; M, n=8), mean age: 49 (range: 36-60 years)                                                                                                                                                                 |
| <b>Multicomponent intervention</b> |      |        |                              |                            |                                                                                                                                                                                                                          |
| Kierkegaard et al. <sup>20</sup>   | 2011 | Sweden | RCT                          | DM1                        | n=35; SG: n=18 (F, n=10; M, n=8), mean age: 44±11 years (range: 20-60 years); CG: n=17 (F, n=10; M, n=7), mean age: 41±15 years (range: 20-65 years). IC: ability to walk (≥ 50 m) without assistance and MIRS grade 2–5 |
| Missaoui et al. <sup>21</sup>      | 2010 | France | Retrospective study          | DM1                        | n=20 (F, n=7; M, n=13), mean age: 51 years (range: 32-69 years), IC: ability to walk unaided (≥ 10 m) and stand for 1 min                                                                                                |

Abbreviations: MD, Muscular Dystrophy; DMD, Duchenne Muscular Dystrophy; M, Males; IC, Inclusion Criteria; ROM, Range of Motion; CG, Control Group; FSHD, Facioscapulohumeral dystrophy; F, Females; CSS, Clinical Severity Scale; RCT, Randomised Controlled Trial; SG, Study Group; CG, Control Group; DM1, Myotonic Dystrophy type 1; MIRS, Muscular Impairment Rating Scale; MRC, Medical Research Council; BMD, Becker Muscular Dystrophy; LGMD, Limb-girdle muscular dystrophy; CMD, Congenital Muscular Dystrophy; AFCSD, Ambulatory Functional Classification System for DMD; CBT, Cognitive Behavioural Therapy; ATG, Aerobic Training Group; DM2, Myotonic Dystrophy type 2; NSAA, North Star Ambulatory Assessment.
