# Supplementary material for: Effectiveness of conservative non-pharmacological interventions in people with muscular dystrophies: a systematic review and meta-analysis
Source: PubMed Central journal article supplement — J Neurol Neurosurg Psychiatry. 2023 Dec 12;95(5):442–53. doi: 10.1136/jnnp-2023-331988 (PMC11041561; doi:10.1136/jnnp-2023-331988), 2023-12-12
Supplement: jnnp-2023-331988supp006.pdf [file jnnp-2023-331988supp006.pdf]

## Supplementary file 6. Conservative non-pharmacological interventions included in the literature review and meta-analysis

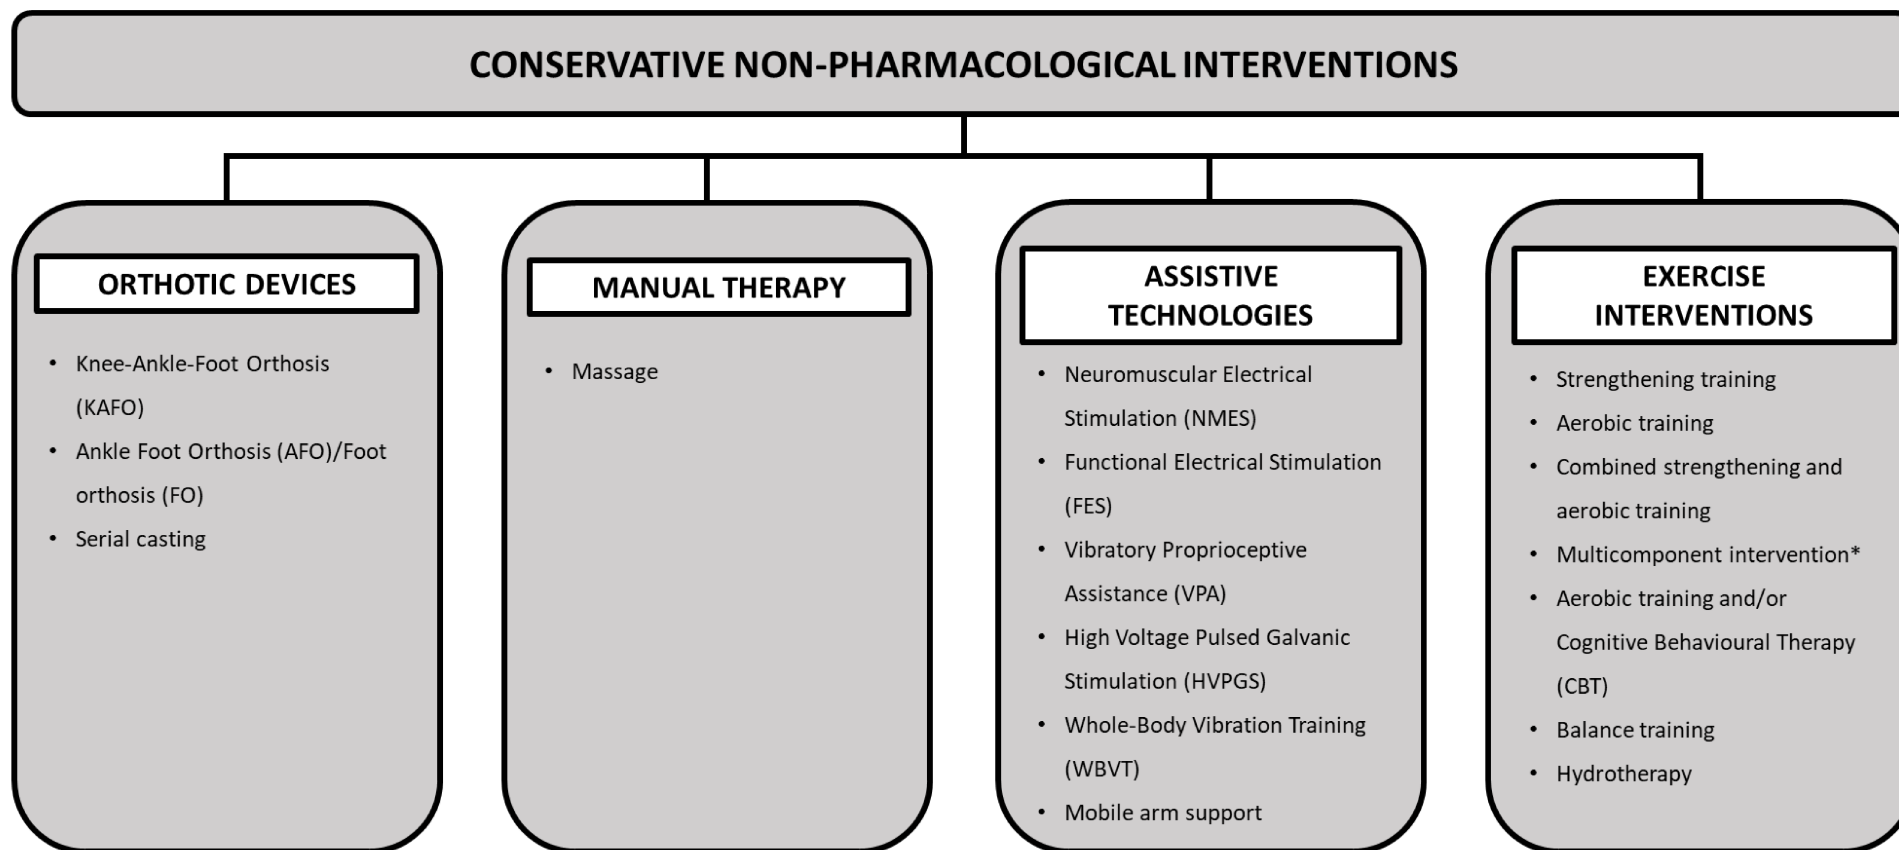

\*Multicomponent intervention included studies adopting intervention programmes consisting of three or more conservative non-pharmacological intervention types
