# Supplementary material for: Effectiveness of conservative non-pharmacological interventions in people with muscular dystrophies: a systematic review and meta-analysis
Source: PubMed Central journal article supplement — J Neurol Neurosurg Psychiatry. 2023 Dec 12;95(5):442–53. doi: 10.1136/jnnp-2023-331988 (PMC11041561; doi:10.1136/jnnp-2023-331988), 2023-12-12
Supplement: jnnp-2023-331988supp008.pdf [file jnnp-2023-331988supp008.pdf]

## Supplementary file 8. Effect sizes in the included conservative non-pharmacological interventions

| Orthotic devices                          |                                           |                                         |                                           |                                               |                                         |
|-------------------------------------------|-------------------------------------------|-----------------------------------------|-------------------------------------------|-----------------------------------------------|-----------------------------------------|
| Intervention subtype                      | Comparator                                | Sample size                             | Measure type                              | Outcome measures                              | ES (95% CI)                             |
| Serial casting <sup>42</sup>              | Before intervention vs after intervention | n=9                                     | Body structure - PROM                     | Ankle dorsiflexion PROM (right knee extended) | 2.28 (-1.75 to 6.3)                     |
|                                           |                                           | n=6                                     |                                           | Ankle dorsiflexion PROM (right knee flexed)   | 1.18 (-2.09 to 4.45)                    |
|                                           |                                           | n=9                                     |                                           | Ankle dorsiflexion PROM (left knee extended)  | 2.73 (-1.14 to 6.6)                     |
|                                           |                                           | n=6                                     |                                           | Ankle dorsiflexion PROM (left knee flexed)    | 1.88 (-1.78 to 5.54)                    |
|                                           |                                           | n=9                                     | Activities and participation - Mobility   | 10-m run time                                 | -0.14 (-1.07 to 0.78)                   |
|                                           |                                           | n=9                                     |                                           | Timed Gower's sign                            | 0.14 (-0.78 to 1.07)                    |
|                                           |                                           | n=9                                     |                                           | 4SC                                           | -0.06 (-0.99 to 0.86)                   |
|                                           |                                           | AFO/FO <sup>43</sup>                    | Before intervention vs after intervention | n=15                                          | Activities and participation - Mobility |
| 2MWT                                      | 0.51 (-2.81 to 3.82)                      |                                         |                                           |                                               |                                         |
| Rivermead Mobility Index                  | 0.16 (-0.56 to 0.88)                      |                                         |                                           |                                               |                                         |
| Activities and participation - Balance    | BBS                                       |                                         |                                           | 0.51 (-0.5 to 1.51)                           |                                         |
|                                           | Romberg index                             |                                         |                                           | 0.75 (-25.28 to 26.77)                        |                                         |
| Body function ( <i>Patient-reported</i> ) | NASS: Lneur                               |                                         |                                           | 0.28 (-1.92 to 2.47)                          |                                         |
|                                           |                                           |                                         |                                           | Pain                                          | NASS: Lpain                             |
| Activities and participation - QoL        | n=15                                      |                                         |                                           | VAS pain                                      | 0.09 (-0.63 to 0.81)                    |
|                                           |                                           |                                         |                                           |                                               | SF-36: physical functioning             |
|                                           |                                           |                                         |                                           | SF-36: role physical                          | 0.16 (-1.77 to -2.09)                   |
|                                           |                                           |                                         |                                           | SF-36: bodily pain                            | -0.47 (-2.38 to 1.44)                   |
|                                           |                                           |                                         |                                           | SF-36: general health                         | 0.44 (-2.22 to 3.09)                    |
|                                           |                                           |                                         |                                           | SF-36: vitality                               | 0.49 (-2.16 to 3.15)                    |
|                                           |                                           |                                         |                                           | SF-36: social functioning                     | 0.55 (-3.02 to 4.11)                    |
|                                           |                                           |                                         |                                           | SF-36: role emotional                         | 0.27 (-2.24 to 2.78)                    |
|                                           |                                           |                                         |                                           | SF-36: mental health                          | 0.08 (-0.69 to 0.86)                    |
|                                           |                                           | SF-36: physical component summary score | 0.40 (-0.75 to 1.56)                      |                                               |                                         |
| SF-36: mental component summary score     | 0.47 (-0.81 to 1.75)                      |                                         |                                           |                                               |                                         |
| KAFO <sup>44</sup>                        | Conventional KAFO vs modular KAFO         | n=7                                     | Body function                             | PCI walking (beats/min)                       | 0.73 (-0.42 to 1.88)                    |
|                                           |                                           |                                         | Activities and participation - Mobility   | Walking speed                                 | 0.69 (-0.93 to 2.31)                    |

| Manual therapy             |                                              |             |                                            |                                         |                       |  |
|----------------------------|----------------------------------------------|-------------|--------------------------------------------|-----------------------------------------|-----------------------|--|
| Intervention subtype       | Comparator                                   | Sample size | Measure type                               | Outcome measures                        | ES (95% CI)           |  |
| Calf massage <sup>18</sup> | Before intervention<br>vs after intervention | n=20        | Body structure - Muscle<br>structure       | Ankle dorsiflexion PROM (knee flexed)   | 0.51 (-0.34 to 1.37)  |  |
|                            |                                              |             |                                            | Ankle dorsiflexion PROM (knee extended) | 0.62 (-0.27 to 1.5)   |  |
|                            |                                              |             |                                            | Knee extension PROM                     | -0.52 (-1.45 to 0.42) |  |
|                            |                                              |             | Activities and participation<br>- Mobility | 10m walk/run                            | 0 (-0.62 to 0.62)     |  |
|                            |                                              |             |                                            | Gait - speed                            | 0.21 (-0.73 to 1.14)  |  |
|                            |                                              |             |                                            | Gait - cadence                          | 0.19 (-0.57 to 0.95)  |  |
|                            |                                              |             |                                            | Gait - step length                      | 0.15 (-0.49 to 0.79)  |  |
|                            |                                              |             |                                            | Gait - base of support width            | 0.09 (-0.53 to 0.72)  |  |

| Assistive technologies                               |                                                |                                               |                                                    |                                             |                        |
|------------------------------------------------------|------------------------------------------------|-----------------------------------------------|----------------------------------------------------|---------------------------------------------|------------------------|
| Intervention subtype                                 | Comparator                                     | Sample size                                   | Measure type                                       | Outcome measures                            | ES (95% CI)            |
| Arm support <sup>30</sup>                            | Experimental treatment vs usual care treatment | SG:n=7;<br>CG: n=9                            | Body function - AROM                               | Shoulder AROM                               | -0.07 (-3.96 to 3.82)  |
|                                                      |                                                |                                               |                                                    | Elbow AROM                                  | 0.78 (-10.47 to 12.03) |
|                                                      |                                                |                                               |                                                    | Wrist AROM                                  | 0.11 (-2.07 to 2.29)   |
|                                                      |                                                |                                               |                                                    | Total upper limb AROM                       | 0.15 (-10.99 to 11.29) |
|                                                      |                                                | Body function - Muscle strength               | Left shoulder abduction (lbs)                      | -0.42 (-1.43 to 0.6)                        |                        |
|                                                      |                                                |                                               | Right elbow flexion (lbs)                          | -0.17 (-1.58 to 1.24)                       |                        |
|                                                      |                                                |                                               | Left elbow flexion (lbs)                           | -0.10 (-1.09 to 0.89)                       |                        |
|                                                      |                                                |                                               | Right elbow extension (lbs)                        | 0.38 (-0.71 to 1.47)                        |                        |
|                                                      |                                                |                                               | Left elbow extension (lbs)                         | 0.70 (-0.55 to 1.95)                        |                        |
|                                                      |                                                |                                               | Shoulder maximal voluntary contraction (N)         | 0.17 (-4.3 to 4.65)                         |                        |
|                                                      |                                                |                                               | Elbow maximal voluntary contraction (N)            | 0.02 (-0.98 to 1.02)                        |                        |
|                                                      |                                                |                                               | Wrist maximal voluntary contraction (N)            | 0.30 (-3 to 3.61)                           |                        |
|                                                      |                                                | Body function - Muscle endurance              | Total upper limb maximal voluntary contraction (N) | 0.25 (-7.02 to 7.53)                        |                        |
|                                                      |                                                |                                               | A6MCT                                              | -0.21 (-9.53 to 9.12)                       |                        |
|                                                      |                                                | Activities and participation - Limbs function | PUL total score                                    | 0.11 (-1.03 to 1.24)                        |                        |
|                                                      |                                                |                                               | PUL shoulder                                       | -0.1 (-1.11 to 0.91)                        |                        |
| PUL elbow                                            | 0.22 (-0.97 to 1.41)                           |                                               |                                                    |                                             |                        |
| Activities and participation - Functional activities | MFM D3 (%)                                     | -0.11 (-1.12 to 0.9)                          |                                                    |                                             |                        |
|                                                      | Abilhand-plus                                  | 0.15 (-0.87 to 1.17)                          |                                                    |                                             |                        |
| Activities and participation - QoL                   | Kidscreen-52                                   | 0.29 (-0.77 to 1.34)                          |                                                    |                                             |                        |
| WBVT <sup>45</sup>                                   | Before intervention vs after intervention      | n=12                                          | Body function - AROM                               | Ankle dorsiflexion AROM (right)             | 0.65 (-0.74 to 2.04)   |
|                                                      |                                                | n=12                                          | Body function - Muscle                             | MRC leg sum score                           | 0.30 (-1.35 to 1.95)   |
|                                                      |                                                | n=12                                          | strength                                           | Knee sum score (N)                          | 0.41 (-1.31 to 2.14)   |
|                                                      |                                                | n=11                                          |                                                    | Elbow flexion (N)                           | -0.07 (-0.95 to 0.82)  |
|                                                      |                                                | n=12                                          | Activities and participation -                     | 6MWT                                        | 0.05 (-1.55 to 1.65)   |
|                                                      |                                                | n=12                                          | Mobility                                           | 10mWT                                       | 0.10 (-0.71 to 0.90)   |
|                                                      |                                                | n=12                                          |                                                    | 4SC                                         | 0.20 (-0.61 to 1.02)   |
|                                                      |                                                | n=12                                          |                                                    | Supine to stand test                        | -0.17 (-1.07 to 0.74)  |
| FES                                                  | Before intervention vs                         | n=6                                           | Body function - Muscle                             | Right tibialis anterior maximal torque (Nm) | 1.19 (-0.3 to 2.67)    |

|                                                      |                                                         |                      |                                         |                                                            |                                                |
|------------------------------------------------------|---------------------------------------------------------|----------------------|-----------------------------------------|------------------------------------------------------------|------------------------------------------------|
|                                                      | after intervention <sup>16</sup>                        |                      | strength                                |                                                            |                                                |
|                                                      | Before intervention vs after intervention <sup>47</sup> | n=8                  | Activities and participation - Mobility | 6MWT<br>10mWT                                              | 0.37 (-18.19 to 18.94)<br>0.30 (-1.02 to 1.62) |
| NMES                                                 | Before intervention vs after intervention <sup>46</sup> | n=6                  | Body function - Muscle strength         | Total MRC score                                            | 0.63 (-0.52 to 1.78)                           |
|                                                      |                                                         |                      | Activities and participation - Mobility | 10mWT<br>6MWT                                              | 0.41 (-0.84 to 1.66)<br>0.32 (-7.9 to 8.53)    |
|                                                      |                                                         |                      | Activities and participation - Balance  | TUG                                                        | 0.06 (-1.08 to 1.19)                           |
|                                                      | Before intervention vs after intervention <sup>19</sup> | n=9                  | Body function - Fatigue                 | VAS: Fatigue                                               | 0.52 (-0.41 to 1.46)                           |
|                                                      |                                                         |                      | Pain                                    | VAS: Pain                                                  | <b>1.58 (0.61 to 2.55)</b>                     |
|                                                      |                                                         |                      | Activities and participation - Mobility | 6MWT                                                       | 0.66 (-8.57 to 9.89)                           |
| HVPGS <sup>22</sup>                                  | Before intervention vs after intervention               | n=13                 | Body function - Muscle strength         | Right deltoid strength (N)                                 | 0.86 (-9.32 to 11.05)                          |
|                                                      |                                                         |                      |                                         | Left deltoid strength (N)                                  | 0.55 (-6.66 to 7.77)                           |
|                                                      |                                                         |                      |                                         | Right quadriceps femoris strength (N)                      | 0.25 (-6.79 to 7.28)                           |
|                                                      |                                                         |                      |                                         | Left quadriceps femoris strength (N)                       | 0.30 (-7.42 to 8.02)                           |
|                                                      |                                                         |                      | Body function - Muscle endurance        | Right shoulder abduction (n. of repetitions in one minute) | 0.31 (-1.51 to 2.12)                           |
|                                                      |                                                         |                      |                                         | Left shoulder abduction (n. of repetitions in one minute)  | 0.30 (-1.18 to 1.79)                           |
|                                                      |                                                         |                      |                                         | Right knee extension (n. of repetitions in one minute)     | 0.04 (-0.78 to 0.86)                           |
|                                                      |                                                         |                      | Activities and participation - Mobility | Left knee extension (n. of repetitions in one minute)      | 0.11 (-0.94 to 1.17)                           |
|                                                      |                                                         |                      |                                         | 10mWT                                                      | 0.10 (-0.71 to 0.90)                           |
|                                                      |                                                         |                      |                                         | Timed 8-stair climb                                        | -0.05 (-0.85 to 0.76)                          |
|                                                      |                                                         |                      |                                         | Dressing with a t-shirt (s)                                | -0.23 (-1.06 to 0.60)                          |
| Activities and participation - Functional activities | Lawton IADL test                                        | 0.01 (-0.79 to 0.82) |                                         |                                                            |                                                |
|                                                      |                                                         |                      |                                         |                                                            |                                                |
| VPA <sup>41</sup>                                    | Before intervention vs after intervention               | n=8                  | Body function - Muscle strength         | Shoulder abduction MVIC                                    | <b>2.33 (1.32 to 3.34)</b>                     |
|                                                      |                                                         |                      | Activities and participation - QoL      | SF-36: total score                                         | 1.56 (-2.38 to 5.49)                           |
|                                                      |                                                         |                      |                                         | SF-36: role emotional                                      | 1.58 (-3.03 to 6.19)                           |
|                                                      |                                                         |                      |                                         | Self-rated health state                                    | 2.33 (-4.32 to 8.99)                           |

| Exercise interventions |                                                                             |                                                     |                                                         |                                   |                                   |
|------------------------|-----------------------------------------------------------------------------|-----------------------------------------------------|---------------------------------------------------------|-----------------------------------|-----------------------------------|
| Intervention subtype   | Comparator                                                                  | Sample size                                         | Impairment                                              | Outcome measures                  | ES (95% CI)                       |
| Aerobic training       | Before intervention vs after intervention <sup>55</sup>                     | n=11                                                | Body function                                           | HR max                            | 0.27 (-1.18 to 1.71)              |
|                        | Before intervention vs after intervention (12 weeks) <sup>54</sup>          | n=11                                                |                                                         | HR rest                           | 0 (-0.84 to 0.84)                 |
|                        | Before intervention vs after intervention (12 months) <sup>54</sup>         | n=11                                                |                                                         | HR rest                           | 0.36 (-0.85 to 1.58)              |
|                        | Before intervention vs after intervention (12 weeks) <sup>54</sup>          | n=11                                                |                                                         | HR max                            | 1.09 (-2.26 to 4.45)              |
|                        | Before intervention vs after intervention (12 months) <sup>54</sup>         | n=11                                                |                                                         | HR max                            | 0.27 (-0.95 to 1.49)              |
|                        | Before intervention vs after intervention <sup>53</sup>                     | n=12                                                |                                                         | HR                                | 2.45 (-1.51 to 6.58)              |
|                        | Before intervention vs after intervention <sup>55</sup>                     | n=11                                                |                                                         | PR interval                       | -0.28 (-3.04 to 2.48)             |
|                        |                                                                             |                                                     |                                                         | QRS interval                      | -0.06 (-0.93 to 0.81)             |
|                        | Before intervention vs after intervention <sup>55</sup>                     | n=11                                                | Body structure - Body composition                       | Total lean mass (kg)              | 0.17 (-0.8 to 1.13)               |
|                        |                                                                             |                                                     |                                                         | Total lean mass (kg)              | 0.16 (-0.8 to 1.12)               |
|                        | Before intervention vs after intervention (12 weeks) <sup>54</sup>          | n=10                                                |                                                         | Lean tissue mass - whole body (g) | -0.16 (-143.96 to 143.64)         |
|                        | Before intervention vs after intervention (12 months) <sup>54</sup>         | n=11                                                |                                                         | Lean tissue mass - whole body (g) | -1.84 (1349.6 to 1345.93)         |
|                        | Before intervention vs after intervention <sup>55</sup>                     | n=11                                                |                                                         | Fat mass (kg)                     | 0.04 (-0.8 to 0.89)               |
|                        | Before intervention vs after intervention (12 weeks) <sup>54</sup>          | n=10                                                |                                                         | Fat mass - whole body (g)         | 0.16 (-206.86 to 207.18)          |
|                        | Before intervention vs after intervention (12 months) <sup>54</sup>         | n=10                                                |                                                         | Fat mass - whole body (g)         | 0.38 (-415.2 to 415.96)           |
|                        | Before intervention vs after intervention (12 weeks) <sup>54</sup>          | n=10                                                |                                                         | Lean tissue mass - right leg (g)  | -0.11 (-22.75 to 22.53)           |
|                        | Before intervention vs after intervention (12 months) <sup>54</sup>         | n=10                                                |                                                         | Lean tissue mass - right leg (g)  | -1.08 (-200.35 to 198.19)         |
|                        | Before intervention vs after intervention (12 weeks) <sup>54</sup>          | n=10                                                |                                                         | Lean tissue mass - left leg (g)   | -0.08 (-16.22 to 16.05)           |
|                        | Before intervention vs after intervention (12 months) <sup>54</sup>         | n=10                                                |                                                         | Lean tissue mass - left leg (g)   | -1.22 (-211.33 to 208.9)          |
|                        | Before intervention vs after intervention (12 weeks) <sup>54</sup>          | n=10                                                |                                                         | Fat mass - right leg (g)          | 0.15 (-30.23 to 30.53)            |
|                        | Before intervention vs after intervention (12 months) <sup>54</sup>         | n=10                                                |                                                         | Fat mass - right leg (g)          | 0.52 (-86.57 to 87.6)             |
|                        | Before intervention vs after intervention (12 weeks) <sup>54</sup>          | n=10                                                |                                                         | Fat mass - left leg (g)           | 0.20 (-41.64 to 42.05)            |
|                        | Before intervention vs after intervention (12 months) <sup>54</sup>         | n=10                                                |                                                         | Fat mass - left leg (g)           | 0.57 (-99.22 to 100.36)           |
|                        | Experimental treatment vs control treatment (no intervention) <sup>33</sup> | SG: n=8; CG: n=8                                    |                                                         | Body structure - Muscle structure | Whole muscle cross-sectional area |
|                        | Experimental treatment vs control treatment <sup>38</sup>                   | SG: n=10; CG: n=9                                   | Pennation angle - vastus lateralis (dominant side)      |                                   | -0.07 (-0.97 to 0.84)             |
|                        |                                                                             |                                                     | Pennation angle - vastus lateralis (non-dominant side)  |                                   | -0.62 (-1.96 to 0.71)             |
|                        |                                                                             |                                                     | Fascicle length - vastus lateralis (dominant side)      |                                   | -0.06 (-0.97 to 0.84)             |
|                        |                                                                             |                                                     | Fascicle length - vastus lateralis (non-dominant side)  |                                   | 0.18 (-0.73 to 1.08)              |
|                        |                                                                             |                                                     | Muscle thickness - vastus lateralis (dominant side)     |                                   | 0.18 (-1.08 to 0.72)              |
|                        |                                                                             |                                                     | Muscle thickness - vastus lateralis (non-dominant side) |                                   | -0.44 (-1.35 to 0.46)             |
|                        |                                                                             |                                                     | Pennation angle - gastrocnemius (dominant side)         |                                   | -0.29 (-1.31 to 0.73)             |
|                        |                                                                             |                                                     | Pennation angle - gastrocnemius (non-dominant side)     |                                   | -0.11 (-1.03 to 0.81)             |
|                        |                                                                             |                                                     | Fascicle length - gastrocnemius (dominant side)         |                                   | 0.33 (-0.57 to 1.24)              |
|                        |                                                                             | Fascicle length - gastrocnemius (non-dominant side) | 0.34 (-0.56 to 1.25)                                    |                                   |                                   |
|                        |                                                                             | Muscle thickness - gastrocnemius (dominant side)    | -0.25 (-1.15 to 0.66)                                   |                                   |                                   |

|                                                                                     |                    |                                                      |                                                      |                        |
|-------------------------------------------------------------------------------------|--------------------|------------------------------------------------------|------------------------------------------------------|------------------------|
| Before intervention vs after intervention <sup>55</sup>                             | n=11               | Body structure - Bone structure                      | Muscle thickness - gastrocnemius (non-dominant side) | -0.25 (-1.15 to 0.66)  |
|                                                                                     |                    |                                                      | Bone mineral density (g/cm <sup>2</sup> )            | -0.3 (-1.14 to 0.53)   |
|                                                                                     |                    | Body function - Muscle strength                      | Knee extension (Nm)                                  | 0.02 (-0.87 to 0.9)    |
|                                                                                     |                    |                                                      | Grip strength (kg)                                   | -0.09 (-0.94 to 0.76)  |
|                                                                                     |                    |                                                      | Pinch grip (kg)                                      | -0.06 (-0.9 to 0.78)   |
| Experimental intervention vs control intervention (no intervention) <sup>33</sup>   | SG: n=8; CG: n=8   |                                                      | Maximal voluntary contraction at rest (Nm)           | 0.34 (-4.95 to 5.63)   |
| Before intervention vs after intervention <sup>54</sup>                             | n=10               |                                                      | Voluntary activation at rest (%)                     | 0.13 (-1.13 to 0.86)   |
|                                                                                     |                    |                                                      | Hip flexion strength (N)                             | 0 (-0.88 to 0.88)      |
|                                                                                     |                    |                                                      | Hip extension strength (N)                           | 0.19 (-1.08 to 1.47)   |
|                                                                                     |                    |                                                      | Hip adduction strength (N)                           | 0.22 (-1.06 to 1.5)    |
|                                                                                     |                    |                                                      | Hip abduction strength (N)                           | 0.09 (-0.84 to 1.02)   |
|                                                                                     |                    |                                                      | Knee flexion strength (N)                            | 0.75 (-3.07 to 4.57)   |
|                                                                                     |                    |                                                      | Knee extension strength (N)                          | -0.89 (-6.24 to 4.45)  |
|                                                                                     |                    |                                                      | Ankle dorsiflexion strength (N)                      | -1.67 (-7.31 to 3.98)  |
|                                                                                     |                    |                                                      | Ankle plantarflexion strength (N)                    | 2.85 (-4.33 to 10.03)  |
| Experimental treatment vs control treatment <sup>33</sup>                           | SG: n=8; CG: n=8   | Body function - Muscle endurance                     | Quadriceps endurance (n. of repetitions)             | 1.05 (-3.22 to 5.32)   |
| Experimental treatment vs control treatment <sup>38</sup>                           | SG: n=10; CG: n=9  | Activities and participation - Mobility              | 6MWT                                                 | 0.55 (-21.65 to 22.74) |
| Before intervention vs after intervention <sup>55</sup>                             | n=11               |                                                      | 6MWT                                                 | 0.67 (-13.24 to 14.59) |
| Experimental intervention (group A) vs control intervention (group B) <sup>32</sup> | SG: n=15; CG: n=15 |                                                      | 6MWT                                                 | 1.38 (-8.95 to 11.71)  |
| Experimental treatment vs control treatment <sup>38</sup>                           | SG: n=10; CG: n=9  | Activities and participation - Functional activities | MFM total score (%)                                  | 0.68 (-1.32 to 2.67)   |
|                                                                                     |                    |                                                      | MFM-D1 (%)                                           | 0.68 (-2.87 to 4.23)   |
|                                                                                     |                    |                                                      | MFM-D2 (%)                                           | 0.42 (-0.68 to 1.52)   |
|                                                                                     |                    |                                                      | MFM-D3 (%)                                           | 0.19 (-0.81 to 1.2)    |
| Before intervention vs after intervention <sup>55</sup>                             | n=11               | Activities and participation - Balance               | TUG                                                  | 0.73 (-0.16 to 1.6)    |
|                                                                                     |                    |                                                      | 5XSTS                                                | 1.11 (-0.3 to 2.24)    |
| Experimental treatment vs control treatment <sup>33</sup>                           | SG: n=8; CG: n=8   | Body function - Fatigue                              | FSS                                                  | 1.14 (-4.15 to 6.43)   |
|                                                                                     |                    | Activities and participation - QoL                   | SF-36 total score                                    | 0.75 (-4.19 to 5.7)    |

| Intervention subtype                                                                            | Comparator                                                                                      | Sample size                                        | Impairment                              | Outcome measures          | ES (95% CI)            |
|-------------------------------------------------------------------------------------------------|-------------------------------------------------------------------------------------------------|----------------------------------------------------|-----------------------------------------|---------------------------|------------------------|
| Aerobic training and/or CBT                                                                     | Experimental intervention vs control intervention (usual care) <sup>23</sup>                    | SG: n=128; CG: n=127                               | Body function                           | Borg RPE score (end test) | 0.16 (-0.08 to 0.41)   |
|                                                                                                 | Experimental intervention (aerobic training) vs control intervention (usual care) <sup>24</sup> | SG (aerobic training): n=20; CG (usual care): n=24 | Body function - Muscle strength         | Quadriceps MVIC           | 0.34 (-0.65 to 1.33)   |
|                                                                                                 | Experimental intervention (CBT) vs control intervention (usual care) <sup>24</sup>              | SG (CBT): n=13; CG (usual care): n=24              |                                         |                           | -0.81 (-2.52 to 0.91)  |
|                                                                                                 | Experimental intervention (aerobic training) vs experimental intervention (CBT) <sup>24</sup>   | SG (aerobic training): n=20; SG (CBT): n=13        |                                         |                           | -0.81 (-2.52 to 0.91)  |
|                                                                                                 | Experimental intervention vs control intervention (usual care) <sup>23</sup>                    | SG: n=128; CG: n=127                               | Activities and participation - Mobility | 6MWT                      | 0.23 (-2.47 to 2.93)   |
|                                                                                                 | Experimental intervention (aerobic training) vs control intervention (usual care) <sup>24</sup> | SG (aerobic training): n=20; CG (usual care): n=24 |                                         |                           | 0.24 (-7.72 to 8.21)   |
|                                                                                                 | Experimental intervention (CBT) vs control intervention (usual care) <sup>24</sup>              | SG (CBT): n=13; CG (usual care): n=24              |                                         |                           | -0.07 (-2.66 to 2.53)  |
|                                                                                                 | Experimental intervention (aerobic training) vs experimental intervention (CBT) <sup>24</sup>   | SG (aerobic training): n=20; SG (CBT): n=13        |                                         |                           | -0.4 (-12.25 to 11.44) |
|                                                                                                 | Experimental intervention vs control intervention (usual care) <sup>23</sup>                    | SG: n=128; CG: n=127                               | Body function - Fatigue                 | FDSS score                | 0.38 (-0.06 to 0.82)   |
|                                                                                                 | Experimental intervention (aerobic training) vs control intervention (usual care) <sup>24</sup> | SG (aerobic training): n=20; CG (usual care): n=24 |                                         | CIS-fatigue               | 0.45 (-0.005 to 0.89)  |
|                                                                                                 | Experimental intervention (CBT) vs control intervention (usual care) <sup>24</sup>              | SG (CBT): n=13; CG (usual care): n=24              |                                         | CIS-fatigue               | 0.41 (-0.46 to 1.27)   |
|                                                                                                 | Experimental intervention (aerobic training) vs experimental intervention (CBT) <sup>24</sup>   | SG (aerobic training): n=20; SG (CBT): n=13        |                                         |                           | 2.35 (-2.03 to 6.74)   |
|                                                                                                 | Experimental intervention (aerobic training) vs control intervention (usual care) <sup>24</sup> | SG (aerobic training): n=20; CG (usual care): n=24 |                                         |                           | 1.65 (-2.27 to 5.58)   |
|                                                                                                 | Experimental intervention (CBT) vs control intervention (usual care) <sup>24</sup>              | SG (CBT): n=13; CG (usual care): n=24              |                                         |                           | -0.71 (-1.57 to 0.16)  |
|                                                                                                 | Experimental intervention (aerobic training) vs experimental intervention (CBT) <sup>24</sup>   | SG (aerobic training): n=20; SG (CBT): n=13        |                                         |                           | 0.48 (-0.33 to 1.29)   |
|                                                                                                 | Experimental intervention vs control intervention (usual care) <sup>23</sup>                    | SG: n=128; CG: n=127                               | Activities and participation - QoL      | INQOL quality of life     | 0.18 (-0.43 to 0.79)   |
|                                                                                                 | Experimental intervention (aerobic training) vs control intervention (usual care) <sup>24</sup> | SG (aerobic training): n=20; CG (usual care): n=24 |                                         | DM1-ActivC                | 0.27 (-0.22 to 0.77)   |
|                                                                                                 | Experimental intervention (CBT) vs control intervention (usual care) <sup>24</sup>              | SG (CBT): n=13; CG (usual care): n=24              |                                         | MDHI score                | 0.17 (-0.19 to 0.53)   |
|                                                                                                 | Experimental intervention (aerobic training) vs experimental intervention (CBT) <sup>24</sup>   | SG (aerobic training): n=20; SG (CBT): n=13        |                                         | BDI-FS score              | -0.05 (-0.30 to 0.19)  |
|                                                                                                 | Experimental intervention (aerobic training) vs control intervention (usual care) <sup>24</sup> | SG (aerobic training): n=20; CG (usual care): n=24 |                                         | AES-c score               | 0.26 (-0.06 to 0.59)   |
|                                                                                                 | Experimental intervention (CBT) vs control intervention (usual care) <sup>24</sup>              | SG (CBT): n=13; CG (usual care): n=24              |                                         | NHP-sleep                 | 0.88 (-3.10 to 4.87)   |
|                                                                                                 | Experimental intervention (aerobic training) vs experimental intervention (CBT) <sup>24</sup>   | SG (aerobic training): n=20; SG (CBT): n=13        |                                         |                           | 1.31 (-4.46 to 7.07)   |
|                                                                                                 | Experimental intervention (aerobic training) vs control intervention (usual care) <sup>24</sup> | SG (aerobic training): n=20; CG (usual care): n=24 |                                         |                           | 0.32 (-1.35 to 1.99)   |
| Experimental intervention (CBT) vs control intervention (usual care) <sup>24</sup>              | SG (CBT): n=13; CG (usual care): n=24                                                           |                                                    |                                         | 0.44 (-10.65 to 11.53)    |                        |
| Experimental intervention (aerobic training) vs experimental intervention (CBT) <sup>24</sup>   | SG (aerobic training): n=20; SG (CBT): n=13                                                     |                                                    |                                         | 0.12 (-2.91 to 3.16)      |                        |
| Experimental intervention (aerobic training) vs control intervention (usual care) <sup>24</sup> | SG (aerobic training): n=20; CG (usual care): n=24                                              |                                                    |                                         | -0.3 (-9.97 to 9.38)      |                        |
| Experimental intervention (aerobic training) vs control intervention (usual care) <sup>24</sup> | SG (aerobic training): n=20; CG (usual care): n=24                                              | Pain                                               | VAS: pain                               | 0.12 (-0.60 to 0.85)      |                        |

|                          |                                                                                               |                                                |                                                    |                                                                                                                                                                                                                                                                                                                                                                                                                                                                                                                                                                                                                                                                                                                                                                                                                                                                                                                                                                                                                                                                                                                                                                                                                                                                                                                                                                                                                                                                                                                                                                                                                                                              |
|--------------------------|-----------------------------------------------------------------------------------------------|------------------------------------------------|----------------------------------------------------|--------------------------------------------------------------------------------------------------------------------------------------------------------------------------------------------------------------------------------------------------------------------------------------------------------------------------------------------------------------------------------------------------------------------------------------------------------------------------------------------------------------------------------------------------------------------------------------------------------------------------------------------------------------------------------------------------------------------------------------------------------------------------------------------------------------------------------------------------------------------------------------------------------------------------------------------------------------------------------------------------------------------------------------------------------------------------------------------------------------------------------------------------------------------------------------------------------------------------------------------------------------------------------------------------------------------------------------------------------------------------------------------------------------------------------------------------------------------------------------------------------------------------------------------------------------------------------------------------------------------------------------------------------------|
|                          | care) <sup>24</sup>                                                                           | CG (usual care): n=24                          |                                                    |                                                                                                                                                                                                                                                                                                                                                                                                                                                                                                                                                                                                                                                                                                                                                                                                                                                                                                                                                                                                                                                                                                                                                                                                                                                                                                                                                                                                                                                                                                                                                                                                                                                              |
|                          | Experimental intervention (CBT) vs control intervention (usual care) <sup>24</sup>            | SG (CBT): n=13;<br>CG (usual care): n=24       |                                                    | 0.42 (-1.42 to 2.25)                                                                                                                                                                                                                                                                                                                                                                                                                                                                                                                                                                                                                                                                                                                                                                                                                                                                                                                                                                                                                                                                                                                                                                                                                                                                                                                                                                                                                                                                                                                                                                                                                                         |
|                          | Experimental intervention (aerobic training) vs experimental intervention (CBT) <sup>24</sup> | SG (aerobic training): n=20;<br>SG (CBT): n=13 |                                                    | 0.31 (-1.19 to 1.81)                                                                                                                                                                                                                                                                                                                                                                                                                                                                                                                                                                                                                                                                                                                                                                                                                                                                                                                                                                                                                                                                                                                                                                                                                                                                                                                                                                                                                                                                                                                                                                                                                                         |
| <b>Strength training</b> | Before intervention vs after intervention <sup>49</sup>                                       | n=7                                            | Body structure -<br>Muscle structure               | Cross-sectional area (mm <sup>2</sup> )<br>0.11 (-23.62 to 23.83)                                                                                                                                                                                                                                                                                                                                                                                                                                                                                                                                                                                                                                                                                                                                                                                                                                                                                                                                                                                                                                                                                                                                                                                                                                                                                                                                                                                                                                                                                                                                                                                            |
|                          | Experimental intervention vs control intervention <sup>29</sup>                               | SG: n=15; CG: n=13                             | Body structure -<br>PROM                           | Knee extension PROM<br>-0.39 (-4.23 to 3.45)<br>Ankle dorsiflexion PROM<br>-0.22 (-1.89 to 1.44)<br>Elbow extension PROM<br>-0.35 (-2.42 to 1.73)                                                                                                                                                                                                                                                                                                                                                                                                                                                                                                                                                                                                                                                                                                                                                                                                                                                                                                                                                                                                                                                                                                                                                                                                                                                                                                                                                                                                                                                                                                            |
|                          | Experimental intervention vs control intervention <sup>36</sup>                               | SG: n=12; CG: n=12                             | Body function -<br>Muscle strength<br>(upper limb) | Right total upper limb strength (mean strength)<br>-0.06 (-0.86 to 0.74)<br>Left total upper limb strength (mean strength)<br>-0.07 (-0.87 to 0.73)<br>MRC sum score: upper limb<br>0.15 (-0.63 to 0.93)<br>Neck flexion (kg)<br>-0.08 (-0.98 to 0.82)<br>Neck extension (kg)<br>0.35 (-0.55 to 1.26)<br>Right shoulder abduction (kg)<br>0.65 (-0.28 to 1.57)<br>Left shoulder abduction (kg)<br>0.63 (-0.29 to 1.55)<br>Right shoulder girdle muscle strength (mean strength)<br>0.22 (-0.59 to 1.02)<br>Left shoulder girdle muscle strength (mean strength)<br>0.18 (-0.63 to 0.97)<br>Right scapulothoracic region (mean strength)<br>-0.06 (-0.86 to 0.74)<br>Left scapulothoracic region (mean strength)<br>-0.07 (-0.88 to 0.73)<br>Right upper limb muscles (mean strength)<br>-0.02 (-0.82 to 0.78)<br>Left upper limb muscles (mean strength)<br>-0.01 (-0.81 to 0.79)<br>Right elbow flexion (kg)<br>-0.38 (-1.31 to 0.53)<br>Left elbow flexion (kg)<br>0.16 (-0.74 to 1.07)<br>Right elbow extension (kg)<br>-0.16 (-1.06 to 0.75)<br>Left elbow extension (kg)<br>0.05 (-0.85 to 0.95)<br>Right forearm muscles (mean strength)<br>0 (-0.8 to 0.80)<br>Left forearm muscles (mean strength)<br>-0.28 (-1.09 to 0.52)<br>Right wrist flexion (kg)<br>-0.06 (-0.96 to 0.84)<br>Left wrist flexion (kg)<br>-0.16 (-1.06 to 0.74)<br>Isometric wrist flexion (N)<br>-0.05 (-0.86 to 0.76)<br>Right wrist extension (kg)<br>-0.37 (-1.27 to 0.53)<br>Left wrist extension (kg)<br>-0.74 (-1.66 to 0.18)<br>Isometric wrist extension (N)<br>0.03 (-0.78 to 0.84)<br>Hand grip (N)<br>0.03 (-0.94 to 0.99)<br>Pinch grip (N)<br>0.1 (-0.71 to 0.90) |
|                          | Experimental intervention vs control intervention <sup>35</sup>                               | SG: n=10; SG: n=9                              |                                                    | MRC sum score: lower limb<br>0.34 (-0.51 to 1.18)<br>Right hip flexion (kg)<br>-0.48 (-1.40 to 0.45)<br>Left hip flexion (kg)<br>0.14 (-0.76 to 1.04)<br>Maximal isometric hip flexion strength (Nm)<br>0.38 (-2.35 to 3.10)<br>Hip flexion (Nm)<br>0.22 (-0.42 to 0.85)<br>Hip extension (Nm)<br>-0.27 (-0.91 to 0.37)<br>Maximal isometric hip extensors strength (Nm)<br>0.13 (-2.16 to 2.42)<br>Hip adduction strength (Nm)<br>-0.23 (-0.86 to 0.40)<br>Hip abduction (1RM)<br>1.3 (-20.16 to 22.77)<br>Left hip abduction (kg)<br>-0.14 (-1.04 to 0.76)<br>Right hip abduction (kg)<br>-0.06 (-0.96 to 0.84)                                                                                                                                                                                                                                                                                                                                                                                                                                                                                                                                                                                                                                                                                                                                                                                                                                                                                                                                                                                                                                            |
|                          | Experimental intervention vs control intervention <sup>36</sup>                               | SG: n=12; CG: n=12                             |                                                    |                                                                                                                                                                                                                                                                                                                                                                                                                                                                                                                                                                                                                                                                                                                                                                                                                                                                                                                                                                                                                                                                                                                                                                                                                                                                                                                                                                                                                                                                                                                                                                                                                                                              |
|                          | Experimental intervention vs control intervention <sup>35</sup>                               | SG: n=10; SG: n=9                              |                                                    |                                                                                                                                                                                                                                                                                                                                                                                                                                                                                                                                                                                                                                                                                                                                                                                                                                                                                                                                                                                                                                                                                                                                                                                                                                                                                                                                                                                                                                                                                                                                                                                                                                                              |
|                          | Experimental intervention vs control intervention (no intervention) <sup>39</sup>             | SG: n=18; CG: n=17                             |                                                    |                                                                                                                                                                                                                                                                                                                                                                                                                                                                                                                                                                                                                                                                                                                                                                                                                                                                                                                                                                                                                                                                                                                                                                                                                                                                                                                                                                                                                                                                                                                                                                                                                                                              |
|                          | Experimental intervention vs control intervention <sup>35</sup>                               | SG: n=10; SG: n=9                              |                                                    |                                                                                                                                                                                                                                                                                                                                                                                                                                                                                                                                                                                                                                                                                                                                                                                                                                                                                                                                                                                                                                                                                                                                                                                                                                                                                                                                                                                                                                                                                                                                                                                                                                                              |
|                          | Experimental intervention vs control intervention (no intervention) <sup>39</sup>             | SG: n=18; CG: n=17                             |                                                    |                                                                                                                                                                                                                                                                                                                                                                                                                                                                                                                                                                                                                                                                                                                                                                                                                                                                                                                                                                                                                                                                                                                                                                                                                                                                                                                                                                                                                                                                                                                                                                                                                                                              |
|                          | Experimental intervention vs control intervention <sup>29</sup>                               | SG: n=12; CG: n=14                             | Body function -<br>Muscle strength<br>(lower limb) |                                                                                                                                                                                                                                                                                                                                                                                                                                                                                                                                                                                                                                                                                                                                                                                                                                                                                                                                                                                                                                                                                                                                                                                                                                                                                                                                                                                                                                                                                                                                                                                                                                                              |
|                          | Experimental intervention vs control intervention <sup>35</sup>                               | SG: n=10; SG: n=9                              |                                                    |                                                                                                                                                                                                                                                                                                                                                                                                                                                                                                                                                                                                                                                                                                                                                                                                                                                                                                                                                                                                                                                                                                                                                                                                                                                                                                                                                                                                                                                                                                                                                                                                                                                              |
|                          | Before intervention vs after intervention <sup>27</sup>                                       | n=15                                           |                                                    |                                                                                                                                                                                                                                                                                                                                                                                                                                                                                                                                                                                                                                                                                                                                                                                                                                                                                                                                                                                                                                                                                                                                                                                                                                                                                                                                                                                                                                                                                                                                                                                                                                                              |
|                          | Experimental intervention vs control intervention <sup>28</sup>                               | SG: n=20; CG: n=20                             |                                                    |                                                                                                                                                                                                                                                                                                                                                                                                                                                                                                                                                                                                                                                                                                                                                                                                                                                                                                                                                                                                                                                                                                                                                                                                                                                                                                                                                                                                                                                                                                                                                                                                                                                              |
|                          | Before intervention vs after intervention <sup>27</sup>                                       | n=15                                           |                                                    |                                                                                                                                                                                                                                                                                                                                                                                                                                                                                                                                                                                                                                                                                                                                                                                                                                                                                                                                                                                                                                                                                                                                                                                                                                                                                                                                                                                                                                                                                                                                                                                                                                                              |
|                          | Experimental intervention vs control intervention <sup>28</sup>                               | SG: n=20; CG: n=20                             |                                                    |                                                                                                                                                                                                                                                                                                                                                                                                                                                                                                                                                                                                                                                                                                                                                                                                                                                                                                                                                                                                                                                                                                                                                                                                                                                                                                                                                                                                                                                                                                                                                                                                                                                              |
|                          | Before intervention vs after intervention <sup>28</sup>                                       | n=11                                           |                                                    |                                                                                                                                                                                                                                                                                                                                                                                                                                                                                                                                                                                                                                                                                                                                                                                                                                                                                                                                                                                                                                                                                                                                                                                                                                                                                                                                                                                                                                                                                                                                                                                                                                                              |
|                          | Experimental intervention vs control intervention <sup>35</sup>                               | SG: n=10; SG: n=9                              |                                                    |                                                                                                                                                                                                                                                                                                                                                                                                                                                                                                                                                                                                                                                                                                                                                                                                                                                                                                                                                                                                                                                                                                                                                                                                                                                                                                                                                                                                                                                                                                                                                                                                                                                              |



|                                                                                   |                    |                                |                                                          |                            |
|-----------------------------------------------------------------------------------|--------------------|--------------------------------|----------------------------------------------------------|----------------------------|
| Experimental intervention vs control intervention <sup>28</sup>                   | SG: n=20; CG: n=20 |                                | Hip abduction (Nm)                                       | 0.32 (-0.33 to 0.96)       |
| Before intervention vs after intervention <sup>27</sup>                           | n=15               |                                | Maximal isometric hip abduction strength (Nm)            | 0.64 (-2.89 to 4.18)       |
| Experimental intervention vs control intervention <sup>35</sup>                   | SG: n=10; SG: n=9  |                                | Maximal isometric knee flexion strength (Nm)             | 0.96 (-3.39 to 5.32)       |
| Before intervention vs after intervention <sup>25</sup>                           | n=17               |                                | Right knee flexion (kg)                                  | 0.05 (-0.85 to 0.95)       |
| Experimental intervention vs control intervention <sup>28</sup>                   | SG: n=20; CG: n=20 |                                | Left knee flexion (kg)                                   | 0.29 (-0.62 to 1.19)       |
| Experimental intervention vs control intervention (no intervention) <sup>37</sup> | SG: n=15; CG: n=15 |                                | Knee flexion maximal voluntary contraction torque (Nm)   | 0.14 (-1.21 to 1.48)       |
| Experimental intervention vs control intervention <sup>35</sup>                   | SG: n=10; SG: n=9  |                                | Knee flexion (Nm)                                        | 0.44 (-0.21 to 1.08)       |
| Before intervention vs after intervention <sup>27</sup>                           | n=15               |                                | Isokinetic knee torque flexion (Nm)                      | 0.21 (-0.97 to 1.38)       |
| Before intervention vs after intervention <sup>26</sup>                           | n=11               |                                | Right knee extension (kg)                                | 0.56 (-0.97 to 1.39)       |
| Before intervention vs after intervention <sup>25</sup>                           | n=17               |                                | Left knee extension (kg)                                 | 0.18 (-0.72 to 1.09)       |
| Experimental intervention vs control intervention (no intervention) <sup>37</sup> | SG: n=15; CG: n=15 |                                | Maximal isometric knee extension strength (Nm)           | -0.18 (-2.37 to 2.02)      |
| Experimental intervention vs control intervention <sup>28</sup>                   | SG: n=20; CG: n=20 |                                | Maximal isometric knee extension strength (Nm)           | 2.31 (-4.22 to 8.83)       |
| Experimental intervention vs control intervention <sup>35</sup>                   | SG: n=10; SG: n=9  |                                | Knee extension maximal voluntary contraction torque (Nm) | 0.06 (-1.37 to 1.49)       |
| Before intervention vs after intervention <sup>27</sup>                           | n=15               |                                | Isokinetic knee torque extension (Nm)                    | 0.11 (-1.11 to 1.33)       |
| Experimental intervention vs control intervention <sup>35</sup>                   | SG: n=10; SG: n=9  |                                | Knee extension strength (Nm)                             | -0.05 (-0.67 to 0.56)      |
| Before intervention vs after intervention <sup>27</sup>                           | n=15               |                                | Right ankle dorsiflexion (kg)                            | 0.55 (-0.37 to 1.46)       |
| Experimental intervention vs control intervention <sup>35</sup>                   | SG: n=10; SG: n=9  |                                | Left ankle dorsiflexion (kg)                             | 0.68 (-0.24 to 1.60)       |
| Before intervention vs after intervention <sup>26</sup>                           | n=11               |                                | Maximal isometric ankle dorsiflexion strength (Nm)       | 0 (-0.71 to 0.72)          |
| Experimental intervention vs control intervention <sup>29</sup>                   | SG: n=16; CG: n=13 | Body function -                | Right ankle plantarflexion (kg)                          | 0.44 (-0.47 to 1.35)       |
|                                                                                   | SG: n=16; CG: n=12 | Muscle endurance               | Left ankle plantarflexion (kg)                           | 0.19 (-0.71 to 1.09)       |
| Experimental intervention vs control intervention <sup>34</sup>                   | SG: n=13; CG: n=13 | Activities and participation - | Leg extension (1 RM)                                     | 1.33 (-13.32 to 15.98)     |
|                                                                                   |                    | Limbs function                 | Leg press (1RM)                                          | 1.66 (-69.41 to 72.73)     |
| Experimental intervention vs control intervention <sup>36</sup>                   | SG: n=12; CG: n=12 |                                | Squat (1RM)                                              | 2.52 (-73.39 to 78.44)     |
| Experimental intervention vs control intervention <sup>36</sup>                   | SG: n=12; CG: n=12 |                                | A6MCT: legs                                              | 0.32 (-13.36 to 14.00)     |
| Experimental intervention vs control intervention <sup>29</sup>                   | SG: n=16; CG: n=13 |                                | A6MCT: arms                                              | 0.18 (-6.62 to 6.98)       |
| Experimental intervention vs control intervention (no intervention) <sup>39</sup> | SG: n=18; CG: n=17 |                                | PUL total                                                | 1.12 (-0.02 to 2.26)       |
| Before intervention vs after intervention <sup>27</sup>                           | n=15               |                                | PUL shoulder                                             | 0.6 (-0.17 to 1.37)        |
| Before intervention vs after intervention <sup>26</sup>                           | n=11               |                                | PUL middle                                               | 0.34 (-0.47 to 1.16)       |
| Before intervention vs after intervention <sup>29</sup>                           | SG: n=17; CG: n=13 |                                | PUL distal                                               | <b>0.87 (0.04 to 1.69)</b> |
| Experimental intervention vs control intervention <sup>36</sup>                   | SG: n=12; CG: n=12 |                                | Timed T-shirt donning                                    | 0.24 (-0.83 to 1.32)       |
| Experimental intervention vs control intervention <sup>35</sup>                   | SG: n=10; SG: n=9  |                                | Timed T-shirt removing                                   | 0.19 (-0.87 to 1.25)       |
| Experimental intervention vs control intervention <sup>36</sup>                   | SG: n=12; CG: n=12 |                                | Upper limb unilateral placing (s)                        | 0.09 (-0.93 to 1.11)       |
| Experimental intervention vs control intervention <sup>35</sup>                   | SG: n=10; SG: n=9  |                                | Upper limb bilateral turning (s)                         | 0.14 (-1.95 to 2.23)       |
| Experimental intervention vs control intervention <sup>29</sup>                   | SG: n=16; CG: n=13 |                                | 9HPT                                                     | 0.07 (-0.67 to 0.81)       |
| Experimental intervention vs control intervention (no intervention) <sup>39</sup> | SG: n=18; CG: n=17 |                                | N. of pegs placed on the Pegboard                        | -0.50 (-1.2 to 0.20)       |
| Before intervention vs after intervention <sup>27</sup>                           | n=15               |                                | LEFS                                                     | 0.68 (-1.46 to 2.83)       |
| Before intervention vs after intervention <sup>26</sup>                           | n=11               |                                | LEFS                                                     | 0.22 (-1.02 to 1.46)       |
| Before intervention vs after intervention <sup>29</sup>                           | SG: n=17; CG: n=13 | Activities and participation - | Timed rise from floor                                    | 0.9 (-4.25 to 6.05)        |
| Experimental intervention vs control intervention <sup>36</sup>                   | SG: n=12; CG: n=12 | Functional activities          | Supine to stand test                                     | 0.53 (-1.24 to 2.30)       |
| Experimental intervention vs control intervention <sup>35</sup>                   | SG: n=10; SG: n=9  |                                | NSAA                                                     | -0.18 (-1.26 to 0.89)      |
| Experimental intervention vs control intervention <sup>36</sup>                   | SG: n=12; CG: n=12 |                                | NSAA                                                     | 0.12 (-0.74 to 0.97)       |
| Experimental intervention vs control intervention <sup>35</sup>                   | SG: n=10; SG: n=9  |                                | QMFT score                                               | -0.18 (-1.45 to 1.08)      |
| Before intervention vs after intervention <sup>29</sup>                           | SG: n=17; CG: n=13 |                                | MFM-total (%)                                            | 0.46 (-1.49 to 2.42)       |
|                                                                                   |                    |                                | MFM-D1 (%)                                               | 0.37 (-2.26 to 2.99)       |
|                                                                                   |                    |                                | MFM-D2 (%)                                               | 0.3 (-1.03 to 1.62)        |
|                                                                                   |                    |                                | MFM-D3 (%)                                               | 0.84 (-0.99 to 2.68)       |
| Experimental intervention vs control intervention <sup>35</sup>                   | SG: n=10; SG: n=9  | Activities and participation - | 6MWT                                                     | 0.06 (-3.30 to 3.42)       |
| Before intervention vs after intervention <sup>27</sup>                           | n=15               |                                | 6MWT                                                     | -0.09 (-2.72 to 2.54)      |

|                                                                                   |                                                         |                                        |                                                                                           |                            |                       |
|-----------------------------------------------------------------------------------|---------------------------------------------------------|----------------------------------------|-------------------------------------------------------------------------------------------|----------------------------|-----------------------|
| Before intervention vs after intervention <sup>26</sup>                           | n=11                                                    | Mobility                               | 10 MWT (comfortable speed)                                                                | 0.43 (-0.41 to 1.26)       |                       |
| Before intervention vs after intervention <sup>26</sup>                           | n=15                                                    |                                        | 10 MWT (maximal speed)                                                                    | 0.6 (-0.24 to 1.44)        |                       |
| Before intervention vs after intervention <sup>29</sup>                           | SG: n=8; CG: n=8                                        | Mobility                               | 10mWT (comfortable speed)                                                                 | 0.13 (-0.58 to 0.85)       |                       |
| Before intervention vs after intervention <sup>25,27</sup>                        | n=17                                                    |                                        | 10mWT (maximal speed)                                                                     | 0 (-0.72 to 0.72)          |                       |
|                                                                                   |                                                         |                                        | 10m run                                                                                   | -0.76 (-2.03 to 0.51)      |                       |
|                                                                                   |                                                         |                                        | Timed stair ascent                                                                        | 0.43 (-0.31 to 1.17)       |                       |
| Before intervention vs after intervention <sup>27</sup>                           | n=15                                                    | Activities and participation - Balance | Timed stair descent                                                                       | 0.68 (-0.06 to 1.43)       |                       |
| Before intervention vs after intervention <sup>26</sup>                           | n=11                                                    |                                        | Mini BESTest                                                                              | 0.16 (-0.60 to 0.92)       |                       |
| Before intervention vs after intervention <sup>25</sup>                           | n=17                                                    |                                        | 30CST                                                                                     | -0.06 (-0.79 to 0.66)      |                       |
| Experimental intervention vs control intervention <sup>34</sup>                   | SG: n=13; CG: n=13                                      |                                        | 30CST                                                                                     | 0.5 (-0.66 to 1.65)        |                       |
|                                                                                   |                                                         |                                        | STS                                                                                       | <b>0.83 (0.08 to 1.58)</b> |                       |
|                                                                                   |                                                         |                                        | TCMS total                                                                                | 2.22 (-0.71 to 5.15)       |                       |
|                                                                                   |                                                         |                                        | TCMS static sitting balance                                                               | <b>1.76 (0.82 to 2.71)</b> |                       |
|                                                                                   |                                                         | TCMS dynamic reaching                  | <b>2.29 (0.37 to 4.22)</b>                                                                |                            |                       |
| Experimental intervention vs control intervention (no intervention) <sup>39</sup> | SG: n=18; CG: n=17                                      | Activities and participation - QoL     | AMPS (logits): motor skills                                                               | -0.50 (-1.17 to 0.17)      |                       |
| Experimental intervention vs control intervention <sup>35</sup>                   | SG: n=10; CG: n=9                                       |                                        | AMPS (logits): process skills                                                             | -0.25 (-0.91 to 0.41)      |                       |
| Before intervention vs after intervention <sup>40</sup>                           | n=17                                                    | Activities and participation - QoL     | Caregiver burden score                                                                    | 0.03 (-0.88 to 0.94)       |                       |
|                                                                                   |                                                         |                                        | SF-36: physical functioning                                                               | 0.33 (-1.24 to 1.90)       |                       |
|                                                                                   |                                                         |                                        | SF-36: role physical                                                                      | 0.51 (-2.88 to 3.90)       |                       |
|                                                                                   |                                                         |                                        | SF-36: bodily pain                                                                        | 0.52 (-2.88 to 3.91)       |                       |
|                                                                                   |                                                         |                                        | SF-36: general health                                                                     | 0.58 (-2.58 to 3.73)       |                       |
|                                                                                   |                                                         |                                        | SF-36: vitality                                                                           | 0.66 (-2.49 to 3.82)       |                       |
|                                                                                   |                                                         |                                        | SF-36: social functioning                                                                 | 0.53 (-3.33 to 4.39)       |                       |
|                                                                                   |                                                         |                                        | SF-36: role emotional                                                                     | 0.50 (-3.13 to 4.12)       |                       |
|                                                                                   |                                                         |                                        | SF-36: mental health                                                                      | 0.53 (-1.71 to 2.77)       |                       |
|                                                                                   |                                                         |                                        | SF-36: physical component summary score                                                   | 0.67 (-0.7 to 2.03)        |                       |
|                                                                                   |                                                         |                                        | SF-36: mental component summary score                                                     | 0.37 (-0.79 to 1.54)       |                       |
|                                                                                   |                                                         |                                        | Physical self-worth: global (Physical Self-Perception Profile questionnaire)              | 0.67 (-0.16 to 1.49)       |                       |
|                                                                                   |                                                         |                                        | Physical self-worth: sport competence (Physical Self-Perception Profile questionnaire)    | 0.33 (-0.38 to 1.04)       |                       |
|                                                                                   |                                                         |                                        | Physical self-worth: physical condition (Physical Self-Perception Profile questionnaire)  | <b>1 (0.17 to 1.82)</b>    |                       |
|                                                                                   |                                                         |                                        | Physical self-worth: body attractiveness (Physical Self-Perception Profile questionnaire) | 0.33 (-0.38 to 1.05)       |                       |
|                                                                                   |                                                         |                                        | Physical self-worth: physical strength (Physical Self-Perception Profile questionnaire)   | 0 (-0.67 to 0.67)          |                       |
| Before intervention vs after intervention <sup>29</sup>                           | SG: n=17; CG: n=13                                      |                                        | Mobility                                                                                  | PEDI: self-care            | 0.1 (-0.71 to 0.92)   |
| Experimental intervention vs control intervention (no intervention) <sup>39</sup> | SG: n=18; CG: n=17                                      |                                        |                                                                                           | PEDI: mobility             | -0.04 (-0.78 to 0.70) |
|                                                                                   |                                                         |                                        |                                                                                           | COPM: performance          | -0.14 (-0.81 to 0.52) |
|                                                                                   |                                                         |                                        |                                                                                           | COPM: satisfaction         | 0.08 (-0.58 to 0.74)  |
| <b>Strength and aerobic training</b>                                              | Before intervention vs after intervention <sup>52</sup> | n=10                                   | Body function                                                                             | Resting diastolic BP       | 1.29 (-2.35 to 4.93)  |
|                                                                                   |                                                         |                                        |                                                                                           | Resting systolic BP        | 1.36 (-5.66 to 8.38)  |
|                                                                                   |                                                         |                                        |                                                                                           | Post-testing diastolic BP  | 1.06 (-1.71 to 3.84)  |
|                                                                                   |                                                         |                                        |                                                                                           | Post-testing systolic BP   | 1.40 (-4.86 to 7.66)  |
|                                                                                   |                                                         |                                        | Body structure - Body composition                                                         | Body fat (%)               | 0.37 (-0.76 to 1.49)  |
|                                                                                   |                                                         |                                        | Total LBM (kg)                                                                            | 0.25 (-0.76 to 1.26)       |                       |

|                                                         |                                                         |                                               |                                               |                        |                       |
|---------------------------------------------------------|---------------------------------------------------------|-----------------------------------------------|-----------------------------------------------|------------------------|-----------------------|
|                                                         |                                                         |                                               | LBM: arms (kg)                                | 0.43 (-0.46 to 1.31)   |                       |
|                                                         |                                                         |                                               | LBM: legs (kg)                                | 0.29 (-0.61 to 1.18)   |                       |
|                                                         |                                                         |                                               | LBM: trunk (kg)                               | 0.14 (-0.75 to 1.03)   |                       |
|                                                         |                                                         |                                               | Total BMD (g cm <sup>-2</sup> )               | 0.59 (-0.28 to 1.47)   |                       |
|                                                         |                                                         |                                               | BMD: legs (g cm <sup>-2</sup> )               | 0.30 (-0.57 to 1.18)   |                       |
|                                                         |                                                         |                                               | BMD: arms (g cm <sup>-2</sup> )               | 0.44 (-0.43 to 1.32)   |                       |
|                                                         |                                                         |                                               | BMD: trunk (g cm <sup>-2</sup> )              | 0.66 (-0.22 to 1.53)   |                       |
|                                                         |                                                         |                                               | BMD: femur (g cm <sup>-2</sup> )              | 0.40 (-0.48 to 1.28)   |                       |
|                                                         |                                                         |                                               | BMD: femoral neck (g cm <sup>-2</sup> )       | 0.65 (-0.23 to 1.52)   |                       |
|                                                         |                                                         | Body function -<br>Muscle strength            | Hand grip (kg)                                | 0.22 (-0.91 to 1.36)   |                       |
|                                                         |                                                         | Activities and<br>participation -<br>Mobility | 6MWT                                          | 0.27 (-9.41 to 9.95)   |                       |
|                                                         |                                                         | Activities and<br>participation -<br>Balance  | 5XSTS                                         | 0.83 (-2.09 to 3.76)   |                       |
|                                                         |                                                         |                                               | TUG                                           | 0.47 (-0.93 to 1.86)   |                       |
|                                                         |                                                         | Activities and<br>participation - QoL         | SF-36: general health                         | 0.72 (-3.09 to 4.54)   |                       |
|                                                         |                                                         |                                               | SF-36: bodily pain                            | -0.13 (-1.91 to 1.65)  |                       |
|                                                         |                                                         |                                               | SF-36: social functioning                     | 0.09 (-1.08 to 1.26)   |                       |
|                                                         |                                                         |                                               | SF-36: role physical                          | 0.42 (-2.75 to 3.58)   |                       |
|                                                         |                                                         |                                               | SF-36: role emotional                         | 0.23 (-1.42 to 1.88)   |                       |
|                                                         |                                                         |                                               | SF-36: mental health                          | -0.22 (-2.47 to 2.04)  |                       |
|                                                         |                                                         |                                               | SF-36: vitality                               | -0.09 (-1.20 to 1.02)  |                       |
|                                                         |                                                         |                                               | SF-36: physical functioning                   | 0.61 (-3.67 to 4.88)   |                       |
| Before intervention vs after intervention <sup>50</sup> | n=6                                                     | Body function                                 | HR (during submaximal test)                   | 1.76 (-4.35 to 7.87)   |                       |
| Before intervention vs after intervention <sup>51</sup> | n=8                                                     | Body function -<br>Muscle strength            | Isometric knee extension (N)                  | -0.22 (-2.52 to 2.08)  |                       |
|                                                         |                                                         |                                               | Isometric knee flexion (N)                    | -0.31 (-3.91 to 3.29)  |                       |
|                                                         |                                                         |                                               | Squat series performance (%BW/leg)            | 2.67 (-0.27 to 5.61)   |                       |
|                                                         |                                                         |                                               | Calf raise series performance (%BW/leg)       | 1.90 (-4.76 to 8.55)   |                       |
|                                                         |                                                         |                                               | Lunges performance                            | 4.00 (-0.27 to 8.27)   |                       |
|                                                         |                                                         | Activities and<br>participation -<br>Mobility | Walking distance (m/session)                  | 1.60 (-67.01 to 70.21) |                       |
| Before intervention vs after intervention <sup>50</sup> | n=6                                                     | Activities and<br>participation -<br>Balance  | 6MWT                                          | 0.65 (-13.4 to 14.69)  |                       |
|                                                         |                                                         |                                               | Dynamic postural balance test (s)             | 1.05 (-0.72 to 2.81)   |                       |
| <b>Hydrotherapy</b>                                     | Before intervention vs after intervention <sup>17</sup> | n=8                                           | Activities and<br>participation -<br>Mobility | 6MWT                   | -0.27 (-7.96 to 7.41) |
|                                                         |                                                         |                                               |                                               | NSAA                   | -0.40 (-1.79 to 0.99) |
|                                                         |                                                         |                                               | Activities and<br>participation - QoL         | ACTIVLIM patient score | -0.50 (-2.06 to 1.06) |
|                                                         |                                                         |                                               | ACTIVLIM patient measure                      | -0.65 (-1.66 to 0.37)  |                       |
|                                                         |                                                         |                                               | CHU-9D                                        | -0.57 (-1.55 to 0.41)  |                       |
| <b>Balance training</b>                                 | Before intervention vs after intervention <sup>48</sup> | n=11                                          | Body function -<br>Muscle strength            | Ankle dorsiflexion (N) | -0.61 (-3.67 to 2.46) |
|                                                         |                                                         |                                               |                                               | Knee extension (N)     | 0 (-0.84 to 0.85)     |
|                                                         |                                                         |                                               | Activities and<br>participation -<br>Falls    | Fall frequency         | 0.54 (-0.36 to 1.44)  |
|                                                         |                                                         | Activities and                                | 10mWT                                         | -0.18 (-1.03 to 0.67)  |                       |

|                                    |                                                                                   |                    |                                         |                                                                  |                            |
|------------------------------------|-----------------------------------------------------------------------------------|--------------------|-----------------------------------------|------------------------------------------------------------------|----------------------------|
|                                    |                                                                                   |                    | participation - Mobility                |                                                                  |                            |
|                                    |                                                                                   |                    | Activities and participation - Balance  | TUG                                                              | 0.04 (-0.79 to 0.88)       |
| <b>Multicomponent intervention</b> | Experimental intervention vs control intervention (no intervention) <sup>20</sup> | SG: n=18; CG: n=17 | Body function                           | Borg RPE score                                                   | <b>3.83 (2.86 to 4.79)</b> |
|                                    | Before intervention vs after intervention <sup>21</sup>                           | n=20               | Body function - Muscle strength         | Hamstrings isokinetic muscle strength (stronger side)            | 0.68 (-2.02 to 3.38)       |
|                                    |                                                                                   |                    |                                         | Hamstrings isometric muscle strength (weaker side)               | 0.52 (-1.76 to 2.79)       |
|                                    |                                                                                   |                    |                                         | Quadriceps isokinetic muscle strength quadriceps (stronger side) | 0.08 (-0.82 to 0.98)       |
|                                    |                                                                                   |                    |                                         | Quadriceps isokinetic muscle strength (weaker side)              | 0.28 (-1.79 to 2.34)       |
|                                    | Experimental intervention vs control intervention (no intervention) <sup>20</sup> | SG: n=18; CG: n=17 | Activities and participation - Mobility | 6MWT                                                             | 0.09 (-2.57 to 2.75)       |
|                                    | Before intervention vs after intervention <sup>21</sup>                           | n=20               |                                         | Gait - slow speed                                                | 0.12 (-0.50 to 0.74)       |
|                                    |                                                                                   |                    |                                         | Gait - stride frequency (slow speed)                             | 0.17 (-0.59 to 0.93)       |
|                                    |                                                                                   |                    |                                         | Gait - stride length (slow speed)                                | 0 (-0.62 to 0.62)          |
|                                    |                                                                                   |                    |                                         | Gait - fast speed                                                | <b>0.92 (0.26 to 1.57)</b> |
|                                    |                                                                                   |                    |                                         | Gait - stride frequency (fast speed)                             | 0.30 (-0.96 to 1.56)       |
|                                    |                                                                                   |                    |                                         | Gait - stride length (fast speed)                                | 0 (-0.62 to 0.62)          |
|                                    |                                                                                   |                    | Activities and participation - Balance  | FRT                                                              | 0.49 (-0.69 to 1.67)       |
|                                    |                                                                                   |                    |                                         | BBS                                                              | 0.40 (-0.63 to 1.43)       |
|                                    |                                                                                   |                    |                                         | TUG                                                              | 0.42 (-0.41 to 1.25)       |
|                                    | Experimental intervention vs control intervention (no intervention) <sup>20</sup> | SG: n=18; CG: n=17 |                                         | 10XSTS                                                           | 0.12 (-0.59 to 0.82)       |
|                                    |                                                                                   |                    |                                         | TUG                                                              | 0.24 (-0.43 to 0.92)       |
|                                    |                                                                                   |                    | Activities and participation - QoL      | SF- 36: physical functioning                                     | 0.72 (-1.27 to 2.70)       |
|                                    |                                                                                   |                    |                                         | SF- 36: role physical                                            | -1.06 (-6.96 to 4.83)      |
|                                    |                                                                                   |                    |                                         | SF- 36: bodily pain                                              | 0.08 (-0.63 to 0.78)       |
|                                    |                                                                                   |                    |                                         | SF- 36: general health                                           | 1.20 (-1.46 to 3.86)       |
|                                    |                                                                                   |                    | SF- 36: vitality                        | 0.65 (-0.69 to 1.99)                                             |                            |
|                                    |                                                                                   |                    | SF- 36: social functioning              | -1.94 (-6.44 to 2.56)                                            |                            |
|                                    |                                                                                   |                    | SF- 36: role emotional                  | 0.96 (-2.85 to 4.76)                                             |                            |
|                                    |                                                                                   |                    | SF- 36: mental health                   | -1.33 (-6.07 to 3.39)                                            |                            |
|                                    |                                                                                   |                    | ESS                                     | -0.16 (-0.86 to 0.54)                                            |                            |

Abbreviations: ES, Effect Size; CI, Confidence Interval; PROM, Passive Range of Motion; 4SC, Timed 4-stair climb; AFO, Ankle foot orthosis; FO, Foot orthosis; 10mWT, 10-meter walk test; 2MWT, 2 Minute Walk Test; BBS, Berg Balance Scale; NASS, North American Spine Society; Lneur, Lumbar spine neurogenic symptoms; Lpain, Lumbar spine pain/disability; VAS, Visual Analogue Scale; SF-36: 36-Item Short Form Health Survey; KAFO, Knee ankle foot orthosis; PCI, Physiological Cost Index; SG, Study Group; CG: Control Group; AROM, Active range of motion; A6MCT, Assisted 6 Minute Cycle Test; PUL, Performance of Upper Limb; MFM D3 (%), Motor function measure dimension 3; QoL, Quality of life; WBVT, Whole-Body Vibration Training; MRC, Medical Research Council; 6MWT, 6-minute walk test; FES, Functional Electrical Stimulation; NMES, Neuromuscular Electrical Stimulation; TUG, Timed Up and Go Test; HVPGS, High volt pulsed galvanic stimulator; IADL, Lawton Instrumental Activities of Daily Living; VPA, Vibratory Proprioceptive Assistance; MVIC, Maximal Voluntary Isometric contraction; SF-36, 36-Item Short Form Survey; HR, Heart Rate; 5XSTS, 5 times sit to stand; FSS, Fatigue Severity Scale; CBT, Cognitive Behavioural Therapy; RPE, Rating of Perceived Exertion; FDSS, Fatigue and daytime sleepiness scale; CIS-fatigue, Checklist Individual Strength-fatigue subscore; CIS-activity, Checklist Individual Strength-activity subscore; INQoL, Individualised Neuromuscular Quality of Life; DM1-ActivC, Myotonic Dystrophy type 1 Activity and participation scale; MDHI, Myotonic Dystrophy Health Index; BDI-FS, Beck Depression Inventory-Fast Screen; AES, Apathy Evaluation Scale; NHP-sleep, Nottingham Health Profile – sleep subscale; SIP68-sb, Sickness Impact Profile 68 – social behaviour subscale; 1RM, one repetition maximum; 9-HPT, 9-Hole Peg Test; LEFS, Lower Extremity Functional Scale; NSAA, North Star Ambulatory Assessment; 10MWT, 10 Minute Walk Test; 30CST, 30 Seconds Sit To Stand Test; STS, Sit to stand; TCMS, Trunk Control Measurement Scale; AMPS, Assessment of Motor and Process Skills; PEDI, Pediatric Evaluation of Disability Inventory; COPM, Canadian Occupational Performance Measure; BP, Blood Pressure; LBM, Lean Body Mass; BMD, Bone Mass Density; BW, Body Weight; CHU-9D, Child Health Utility 9D; FRT, Functional Reach Test; ESS, Epworth Sleepiness Scale.
